# Supplementary material
Source: publisher figshare collection journal article supplement (https://gsapubs.figshare.com/ndownloader/files/23031362)
Supplement: Supplementary file 1 [file 23031362]

## Sheet: Table S3
Table S3: Mass balance calculation
Mass balance for TTG								Effect of partial melting estimated using mass balance between residue and melt
	Mode	Fe2O3	δ56Fe	±					Fe2O3	δ56Fe	model 1	model 2	Xfe-model_1	Xfe-model_2
Amphibole	0.131498	16.5	0.05	0.04				Cpx	7.7	-0.1	0.6	0.25	0.304448	0.126895
Plagioclase	0.868502	0.15	0.91	0.3				Garnet	22.3	-0.5	0.35	0.15	0.514333	0.220501
WR		2.3	0.0987116	0.0547268				Ilmenite	55	-0.2	0.05		0.181219	0
								Amphibole	16.5	0.05		0.6	0	0.652604
Note: amphibole and plagioclase iron compositions are from Oscar Laurent et al., 2020. The mode has been calculated asuming the average composition of 2.3 wt.% Fe2O3 for TTG (Laurent et al., 2020). The Fe isotope composition of amphibole and plagioclase are compiled values from Du et al., 2017.								WR			15.175	15.17
													δ56Fe eclogitic residue	δ56Fe amphibolitic residue
													-0.323855	-0.0903098
								F%	0.3				δ56Fe TTG #1	δ56Fe TTG #2
								δ56Fe source	0.1				0.281652	0.181561
								Note: amphibole iron compositions are from Oscar Laurent et al., 2020, the iron contents in cpx, garnet and ilmenite are canonical composition for eclogite. The mode has been calculated asuming the average composition of 2.3 wt.% Fe2O3 for TTG (Laurent et al., 2020). The Fe isotope composition of cpx, ilmenite and amphibole are compiled values from Du et al., 2017, garnet iron isotpe composition …
			0.296502
													0.491119	0.38464
References
Laurent, O., Björnsen, J., Wotzlaw, J.-F., Bretscher, S., Pimenta Silva, M., Moyen, J.-F., Ulmer, P., and Bachmann, O., 2020, Earth’s earliest granitoids are crystal-rich magma reservoirs tapped by silicic eruptions.: Nature Geoscience.
Du, D.-H., Wang, X.-L., Yang, T., Chen, X., Li, J.-Y., and Li, W., 2017, Origin of heavy Fe isotope compositions in high-silica igneous rocks: A rhyolite perspective: Geochimica et Cosmochimica Acta, v. 218, p. 58-72.
Ye, H., Wu, C., Brzozowski, M. J., Yang, T., Zha, X., Zhao, S., Gao, B., and Li, W., 2020, Calibrating equilibrium Fe isotope fractionation factors between magnetite, garnet, amphibole, and biotite: Geochimica et Cosmochimica Acta, v. 271, p. 78-95.

## Sheet: G47647
Doucet, L.S., et al., 2020, Archean lithospheric differentiation: Insights from Fe and Zn isotopes: Geology, v. 48, https://doi.org/10.1130/G47647.1
